# Supplementary material
Source: HighWire-hosted journal article supplement (https://www.qdcxjkg.com/highwire/filestream/113561/field_highwire_adjunct_files/6/22_NSDAP_membership_card.pdf)
Supplement: 22_NSDAP_membership_card.pdf [file 22_NSDAP_membership_card.pdf]

Reference no. 22 of

Winkelmann A, Noack T: The Clara cell – a 'Third Reich eponym'? *Eur Respir J* 2010; 36: 722–727

NSDAP-membership card of Dr. Max Clara. *Archive*: Bundesarchiv, Berlin. *Signature*: BArch (former BDC), NSDAP-Zentralkartei.

**Short comment by the authors:**

The membership card of Max Clara from the central register of NSDAP, demonstrating that Clara joined the Nazi party on 1<sup>st</sup> April 1935, i.e. on the day he took up his new post in Leipzig.

The stamp on the right, entitled "Verwarnung" (admonishment or reprimand) refers to the decision of the Party Court of 19 February 1943 (see reference 26).

19

Name Clara Max Dr  
mm

G. D. 12. 5. 99 Ort Vils

Stand Universitätsprofessor  
1. APRIL 1935

Mitgl.-Nr. 3610102 Eingetr.

Ausgetr.

Wiedereingetr.

Wohnung Blinnau b. Bism  
Ausland

D.-Gr. Franken Gau  
Land 3.37/10

Wohnung L. 93. Ring Leipzig 38/38

D.-Gr. Leipzig Gau La.  
La. 11.42/84

Wohnung P. Rembrandtstr. 13.

D.-Gr. Pasing Gau Mün. Odb.

Verwarnung  
N. O. B. Be. 4. 19. 2. 43  
P. 2. 5. / 199 / 42 Sa.
